# Supplementary material for: Metabolic changes and potential biomarkers in "Candidatus Liberibacter solanacearum"-infected potato psyllids: implications for psyllid-pathogen interactions
Source: Front Plant Sci. 2023 Jul 19;14:1204305. doi: 10.3389/fpls.2023.1204305 (PMC10394617; doi:10.3389/fpls.2023.1204305)
Supplement: Supplementary file 3 [file Table_3.xlsx]

## Sheet: Sheet1
MT	Log2FC	FC	P.Value	VIP	Description	Average Mz	Metabolite name	Mass	ΔPPM	Name	Formula	CAS	insect_uninfected_1neg_1	insect_uninfected_1neg_2	insect_uninfected_1neg_3	insect_uninfected_1neg_4	insect_uninfected_1neg_5	insect_infected_1neg_1	insect_infected_1neg_2	insect_infected_1neg_3	insect_infected_1neg_4	insect_infected_1neg_5
M723T2-629	3.76647	13.6088	0.000100543	1.92642	up	723.365	Unknown	688.41	20	PA(18:4(6Z,9Z,12Z,15Z)/18:4(6Z,9Z,12Z,15Z))	C39H61O8P		49	62	439	224	246	2612	3601	2691	1585	3392
M775T11-749	3.34739	10.1781	0.0243025	1.46258	up	775.567	Unknown	740.596	2	TG(12:0/12:0/20:5(5Z,8Z,11Z,14Z,17Z))[iso3]	C47H80O6		402	31	341	482	120	1568	3628	1930	919	5960
M416T0-226	3.20346	9.21164	4.56319e-05	1.94991	up	416.138	Unknown	194.058	18	Ferulic acid	C10H10O4	537-98-4	402	430	378	507	362	3341	4398	3353	2845	5214
M623T2-518	2.61986	6.14692	0.000964606	1.79959	up	292.246		292.101	13	Canavaninosuccinate	C9H16N4O7	56073-32-6	429	221	467	534	214	1457	2487	3400	2656	1464
M738T9-647	2.59403	6.03784	0.00948177	1.58169	up	738.505	Unknown	703.515	27	PC(12:0/18:1(9Z))	C38H74NO8P		65956	276685	187477	226394	202039	1051088	1458933	1151758	1922443	203359
M693T1-594	1.84624	3.59562	0.0265916	1.45785	up	693.315	Unknown	657.437	16	PE(12:0/18:3(6Z,9Z,12Z))	C35H64NO8P		1821	828	331	1046	1407	3783	4698	1921	1837	7296
M830T11-806	1.65167	3.14198	0.0306653	1.39885	up	830.595	Unknown	795.614	13	PC(O-16:0/22:4(7Z,10Z,13Z,16Z))[U]	C46H86NO7P		74798	71813	44231	43728	90577	32141	275225	322259	140577	251402
M644T0-542	1.61322	3.05934	0.000396996	1.85358	up	644.03	Unknown	605.06	21	UDP-N-acetyl-alpha-D-glucosamine	C17H25N3O17P2		1063	1177	438	1746	1205	4191	3328	2503	4232	2967
M719T0-626	1.44512	2.72285	5.38915e-06	1.9894	up	719.201	Unknown	717.531	4	PE(16:0/18:1(9Z))	C39H76NO8P	26662-94-2	17966	15933	26029	34918	29678	61038	69538	72741	68029	67714
M115T0-23	1.43927	2.71184	0.000480269	1.84084	up	115.003	w/o MS2:Fumaric acid (not validated); PlaSMA ID-24	116.011	3	Fumaric acid	C4H4O4	110-17-8	5027	5180	3510	9066	3619	13807	11589	16720	11824	17658
M601T0-492	1.25586	2.3881	0.00353184	1.69308	up	601.138	Unknown	563.528	2	Cer(d18:1/18:1(9Z))	C36H69NO3	5966-28-9	4011	4599	8029	8153	6932	15516	17991	19343	15000	7910
M199T8-84	1.13207	2.19174	0.0262242	1.44647	up	199.169	Unknown	200.178	6	Lauric acid	C12H24O2	143-07-7	3381	1935	2613	3351	2635	4766	5516	9815	7517	2884
M784T11-758	1.05188	2.07323	0.0112819	1.56168	up	784.632	Unknown	785.617	28	DGTA(18:1/22:4(10Z,13Z,16Z,19Z))	C50H87NO7		91	13752	11203	18605	15249	32438	22251	25579	22316	19529
M830T11-807	0.999717	1.99961	0.00770262	1.61427	up	830.632	Unknown	795.659	5	GlcCer(d18:2/23:0)	C47H89NO8		926.305	9808	9263	9451	12922	20127	16228	18722	12365	17282
M377T0-205	0.905132	1.87272	4.89548e-05	1.93768	up	377.083	Unknown	342.116	8	Sucrose	C12H22O11	57-50-1	281938	246214	318817	431051	389723	577722	661143	639126	608235	636982
M506T7-344	0.902105	1.86879	0.00177062	1.7583	up	506.322	Unknown	507.332	7	PC(17:1(10Z)/0:0)	C25H50NO7P		26293	16237	18119	24549	16632	38097	29663	43491	46728	32320
M439T10-252	0.890784	1.85418	0.0380948	1.36329	up	439.408	Unknown	404.438	1	7(Z),11(Z)-Nonacosadiene	C29H56	104410-91-5	31	3709	2685	3680	3412	5471	4847	6115	5943	2687
M132T0-36	0.846268	1.79784	0.0203149	1.4751	up	132.028	Unknown	133.037	17	L-Aspartic Acid	C4H7NO4	56-84-8	3543	1471	2039	2627	1638	4973	4262	2509	5195	3409
M146T0-43	0.721148	1.64849	4.44738e-05	1.9406	up	146.043	Unknown	147.053	17	L-Glutamate	C5H9NO4	56-86-0	20589	21323	17785	26692	20784	37928	32033	35089	35346	36278
M480T7-313	0.667782	1.58863	0.0132645	1.55061	up	480.304	w/o MS2:Unknown (carbon number 23); PlaSMA ID-1341	481.317	12	PC(15:0/0:0)	C23H48NO7P		232619	147491	158933	201460	139767	226678	203824	343017	327075	297828
M102T0-11	0.631823	1.54952	0.0317072	1.39684	up	102.054	Unknown	103.063	23	γ -Aminobutyric Acid	C4H9NO2	1956-12-02	2307	1993	1225	2935	2111	4125	3294	3424	3551	1986
M433T6-245	0.602496	1.51834	0.0292463	1.40844	up	433.231	Unknown	434.243	11	LPA(0:0/18:2(9Z,12Z))	C21H39O7P		11775	4802	7076	7772	4806	11546	9759	12546	9387	11773
M167T0-52	-0.773722	0.584907	0.00387691	1.68695	down	167.023	w/o MS2:Unknown (carbon number 8); PlaSMA ID-149	132.054	0	L-Asparagine	C4H8N2O3	70-47-3	280392	162738	213795	221564	190355	162834	113582	125988	121171	101599
M385T5-210	-0.841048	0.558238	0.0344047	1.39461	down	385.175	Unknown	350.209	9	15-keto-Prostaglandin E2	C20H30O5	26441-05-4	3203	2699	3010	3653	1644	1212	1542	2959	874	1345
M672T0-569	-0.887717	0.540469	0.00817224	1.59959	down	672.993	Unknown	672.509	22	PA(O-18:0/17:2(9Z,12Z))	C38H73O7P		3005	2318	2000	3402	2038	1676	1708	932	908	1674
M449T4-267	-0.889632	0.539752	0.0346821	1.39375	down	449.149	w/o MS2:Unknown (carbon number 22); PlaSMA ID-1210	414.186	14	Octadecyl trichloroacetate	C20H37Cl3O2	35425-17-3	83178	71875	78760	89281	43417	23136	39496	79651	20910	34632
M131T0-35	-0.896505	0.537187	2.82617e-05	1.96304	down	131.081	Unknown	132.09	11	Ornithine	C5H12N2O2	70-26-8	5278	5341	4659	5856	4870	3089	2442	2813	3330	2295
M241T0-111	-0.914042	0.530696	8.46094e-05	1.92178	down	241.091	w/o MS2:Unknown (carbon number 10); PlaSMA ID-367	204.111	26	N6-Acetyl-N6-hydroxy-L-lysine	C8H16N2O4		8017	5987	6095	6639	5921	3816	3762	3382	3390	2982
M215T0-93	-0.985378	0.505093	0.00715431	1.61758	down	215.032	Unknown	180.063	2	α-D-Glucose	C6H12O6	492-62-6	10093	12990	10031	6177	9203	4372	7388	5953	3331	3450
M719T11-627	-0.988153	0.504123	0.0375874	1.36009	down	719.482	Unknown	684.509	4	PA(O-18:0/18:3(6Z,9Z,12Z))	C39H73O7P		5696	2927	3157	4112	5696	4193	1507	2332	423	2428
M685T10-581	-1.0525	0.482133	0.0220318	1.47126	down	685.573	Unknown	650.6	4	CE(18:1)	C45H78O2	303-43-5	18931	20636	12467	20502	11781	441	12525	13703	7695	6288
M264T0-133	-1.05968	0.47974	0.00289351	1.714	down	264.994	Unknown	230.019	20	D-Ribose 5-phosphate	C5H11O8P	4300-28-1	9825	5115	8867	10647	9178	5699	4133	4141	2576	4383
M492T7-327	-1.07725	0.47393	0.0286293	1.42076	down	492.306	Unknown	493.317	7	PC(16:1(9E)/0:0)	C24H48NO7P		6124	2863	2460	3308	2775	2038	1079	2019	1712	1460
M230T0-106	-2.57792	0.167482	0.0155875	1.51344	down	230.017	w/o MS2:Unknown (carbon number 8); PlaSMA ID-345	195.053	24	Dopaquinone	C9H9NO4	25520-73-4	7292	3081	3172	2255	1981	543	849	699	663	224
